# Supplementary material
Source: Springer Nature journal article supplement (https://www.springermedizin.de/resource/supplementary/13075_2008_2475_MOESM6_ESM.pdf/9692170)
Supplement: MOESM6 [file 9692170]

|                       | immunosuppressive agent |      | combination with corticosteroids |      |
|-----------------------|-------------------------|------|----------------------------------|------|
|                       | total (n)               | %    | total (n)                        | %    |
| Methotrexate          | (152/499)               | 30.5 | (101/152)                        | 66.4 |
| Cyclophosphamide      | (111/499)               | 22.2 | (81/111)                         | 73.0 |
| Azathioprine          | (109/499)               | 21.8 | (75/109)                         | 68.8 |
| Hydroxychloroquine    | (36/499)                | 7.2  | (20/36)                          | 55.6 |
| Mycophenolate mofetil | (38/499)                | 7.6  | (26/38)                          | 68.4 |
| Ciclosporine          | (15/499)                | 3.0  | (9/15)                           | 60.0 |
| D-Penicillamine       | (16/499)                | 3.2  | (7/16)                           | 43.8 |

**Table 3:** Frequency of use of immunosuppressive agents and combination with corticosteroids.
